# Supplementary figures and images for: Association of a Combined Cancer Exhaustion Score with Circulating Tumor Cells and Outcome in Ovarian Cancer—A Study of the OVCAD Consortium
Source: MDPI journal article supplement (doi:10.3390/cancers13235865), 2021-11-23

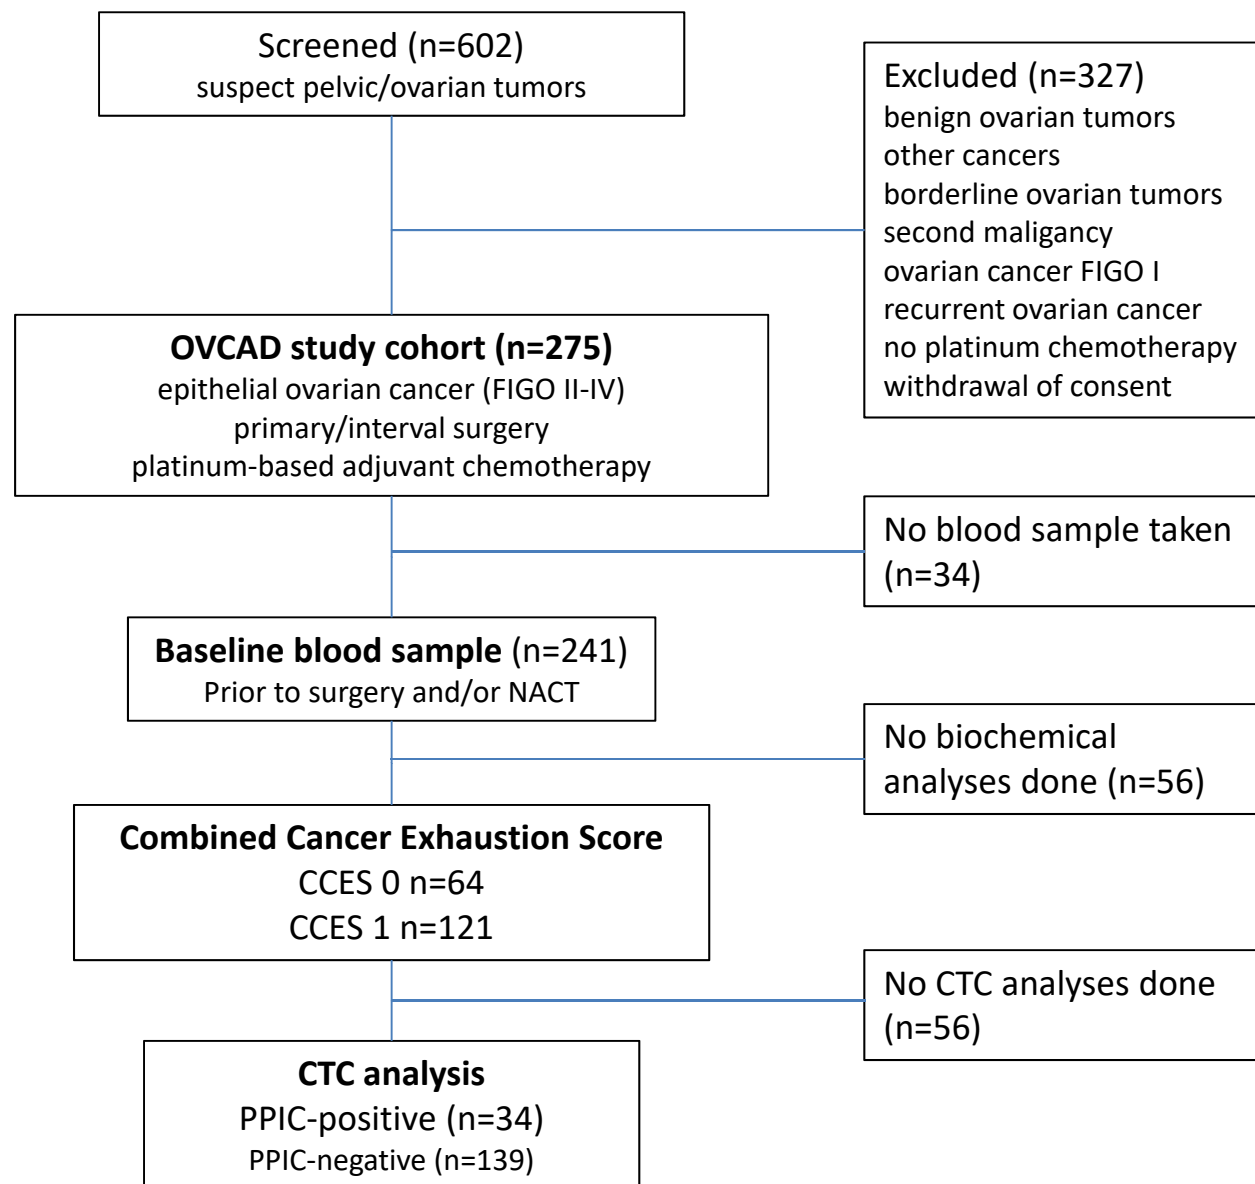

**Supplementary Figure S1.** Case flow diagram of the included OVCAD study patients and samples.

Supplement: s1 [file s1]
